# Supplementary material
Source: PubMed Central journal article supplement (PMC3646081)
Supplement: NIHMS436318-supplement-01.pdf [file NIHMS436318-supplement-01.pdf]

| Table S1. Association between eczema prevalence and mean seasonal temperature #. |                  |                            |                      |         |                        |         |
|----------------------------------------------------------------------------------|------------------|----------------------------|----------------------|---------|------------------------|---------|
| Seasonal mean temperature – quartile (min – max deg F)                           | Eczema Frequency | Eczema Prevalence (95% CI) | OR* (95% CI)         | P-value | Adjusted OR** (95% CI) | P-value |
| <i>Winter</i>                                                                    |                  |                            |                      |         |                        |         |
| 1 <sup>st</sup> (20.3 – 29.0)                                                    | 2310             | 14.7<br>(13.5, 16.0)       | 1.00                 | –       | 1.00                   | –       |
| 2 <sup>nd</sup> (29.8 – 36.8)                                                    | 2550             | 13.8<br>(12.9, 14.6)       | 0.92<br>(0.82, 1.05) | 0.20    | 0.94<br>(0.83, 1.07)   | 0.33    |
| 3 <sup>rd</sup> (37.3 – 44.1)                                                    | 2481             | 13.6<br>(12.9, 14.3)       | 0.91<br>(0.81, 1.02) | 0.11    | 0.88<br>(0.78, 0.99)   | 0.03    |
| 4 <sup>th</sup> (45.4 – 63.9)                                                    | 2352             | 11.6<br>(10.5, 12.7)       | 0.76<br>(0.66, 0.88) | 0.0002  | 0.74<br>(0.63, 0.86)   | <0.0001 |
| <i>Spring</i>                                                                    |                  |                            |                      |         |                        |         |
| 1 <sup>st</sup> (51.8 – 55.7)                                                    | 2443             | 15.2<br>(13.9, 16.4)       | 1.00                 | –       | 1.00                   | –       |
| 2 <sup>nd</sup> (55.8 – 61.1)                                                    | 2469             | 14.0<br>(13.1, 14.9)       | 0.91<br>(0.80, 1.03) | 0.12    | 0.88<br>(0.78, 1.00)   | 0.05    |
| 3 <sup>rd</sup> (61.2 – 65.7)                                                    | 2395             | 11.4<br>(10.2, 12.5)       | 0.72<br>(0.62, 0.83) | <0.0001 | 0.70<br>(0.60, 0.87)   | <0.0001 |
| 4 <sup>th</sup> (66.0 – 76.0)                                                    | 2386             | 12.8<br>(11.7, 13.8)       | 0.82<br>(0.72, 0.94) | 0.004   | 0.75<br>(0.65, 0.87)   | <0.0001 |
| <i>Summer</i>                                                                    |                  |                            |                      |         |                        |         |
| 1 <sup>st</sup> (62.5 – 66.0)                                                    | 2443             | 15.3<br>(14.0, 16.5)       | 1.00                 | –       | 1.000                  | –       |
| 2 <sup>nd</sup> (66.0 – 70.8)                                                    | 2316             | 11.4<br>(10.1, 12.6)       | 0.71<br>(0.61, 0.83) | <0.0001 | 0.74<br>(0.63, 0.86)   | 0.0001  |
| 3 <sup>rd</sup> (70.9 – 75.2)                                                    | 2548             | 13.6<br>(12.9, 14.4)       | 0.88<br>(0.78, 0.98) | 0.02    | 0.84<br>(0.74, 0.94)   | 0.003   |
| 4 <sup>th</sup> (75.3 – 82.0)                                                    | 2386             | 12.8<br>(11.7, 13.8)       | 0.81<br>(0.71, 0.93) | 0.002   | 0.76<br>(0.66, 0.88)   | 0.0001  |
| <i>Autumn</i>                                                                    |                  |                            |                      |         |                        |         |
| 1 <sup>st</sup> (29.7 – 38.7)                                                    | 2169             | 12.3<br>(11.3, 13.2)       | 1.00                 | –       | 1.00                   | –       |
| 2 <sup>nd</sup> (38.8 – 44.2)                                                    | 2674             | 15.0<br>(14.0, 15.9)       | 1.26<br>(1.12, 1.41) | <0.0001 | 1.20<br>(1.07, 1.35)   | 0.002   |
| 3 <sup>rd</sup> (44.3 – 50.4)                                                    | 2498             | 13.3<br>(12.6, 14.1)       | 1.10<br>(0.98, 1.23) | 0.10    | 1.00<br>(0.90, 1.12)   | 0.97    |
| 4 <sup>th</sup> (50.8 – 69.7)                                                    | 2352             | 11.6<br>(10.5, 12.7)       | 0.94<br>(0.82, 1.08) | 0.35    | 0.87<br>(0.75, 1.01)   | 0.06    |

# Monthly statewide mean values of “time-bias” corrected temperatures (Degrees Fahrenheit to 10ths) for 2006 – 2007 were downloaded from the NOAA, NCDC at <ftp://ftp.ncdc.noaa.gov/pub/data/cirs/>.

Season: Winter = December through February; Spring = March through May; Summer = June through August; Autumn = September through November.

\* Univariate logistic regression models were constructed with eczema (yes/no) modeled as the dependent variable and mean seasonal temperature value (quartiles) as the independent variable. OR were estimated for quartiles- 2, 3 and 4 compared with quartile-1.

\*\* Multivariate logistic regression models were constructed with eczema (yes/no) modeled as the dependent variable and mean seasonal temperature values (quartiles) as the independent variable, including age, race/ethnicity (African-American, Hispanic, Caucasian, or Multi/Other), sex (male or female), household income (0-99%, 100-199%, 200-399%, 400+% of poverty level). Adjusted OR were estimated for quartiles- 2, 3 and 4 compared with quartile-1.

| <b>Table S2. Association between eczema prevalence and mean seasonal heating degree days (HDD)<sup>#</sup>.</b> |                             |                                       |                         |                |                                   |                |
|-----------------------------------------------------------------------------------------------------------------|-----------------------------|---------------------------------------|-------------------------|----------------|-----------------------------------|----------------|
| <b>Mean seasonal HDD<sup>##</sup><br/>– quartile (min – max)</b>                                                | <b>Eczema<br/>frequency</b> | <b>Eczema Prevalence<br/>(95% CI)</b> | <b>OR*<br/>(95% CI)</b> | <b>P-value</b> | <b>Adjusted OR**<br/>(95% CI)</b> | <b>P-value</b> |
| <i>Winter</i>                                                                                                   |                             |                                       |                         |                |                                   |                |
| 1 <sup>st</sup> (137.9 – 575.6)                                                                                 | 2352                        | 11.6<br>(10.5, 12.7)                  | 1.00                    | –              | 1.00                              | –              |
| 2 <sup>nd</sup> (620.1 – 833.6)                                                                                 | 2481                        | 13.6<br>(12.9, 14.3)                  | 1.20<br>(1.06, 1.35)    | 0.004          | 1.19<br>(1.05, 1.35)              | 0.008          |
| 3 <sup>rd</sup> (836.2 – 1058.4)                                                                                | 2521                        | 13.8<br>(12.9, 14.7)                  | 1.22<br>(1.07, 1.38)    | 0.003          | 1.27<br>(1.11, 1.46)              | 0.0006         |
| 4 <sup>th</sup> (1060.9 – 1326.6)                                                                               | 2339                        | 14.7<br>(13.5, 15.9)                  | 1.31<br>(1.14, 1.52)    | 0.0002         | 1.35<br>(1.16, 1.57)              | <0.0001        |
| <i>Spring</i>                                                                                                   |                             |                                       |                         |                |                                   |                |
| 1 <sup>st</sup> (5.1 – 89.3)                                                                                    | 2397                        | 12.9<br>(11.9, 13.9)                  | 1.00                    | –              | 1.00                              | –              |
| 2 <sup>nd</sup> (107.2 – 186.9)                                                                                 | 2443                        | 11.4<br>(10.3, 12.5)                  | 0.87<br>(0.75, 1.00)    | 0.06           | 0.93<br>(0.80, 1.07)              | 0.31           |
| 3 <sup>rd</sup> (194.0 – 303.3)                                                                                 | 2410                        | 13.8<br>(12.9, 14.7)                  | 1.08<br>(0.96, 1.22)    | 0.20           | 1.17<br>(1.03, 1.33)              | 0.01           |
| 4 <sup>th</sup> (314.5 – 394.0)                                                                                 | 2443                        | 15.3<br>(14.0, 16.5)                  | 1.22<br>(1.07, 1.39)    | 0.003          | 1.31<br>(1.14, 1.50)              | 0.0001         |
| <i>Summer</i>                                                                                                   |                             |                                       |                         |                |                                   |                |
| 1 <sup>st</sup> (0.0 – 7.8)                                                                                     | 2397                        | 12.9<br>(11.9, 13.9)                  | 1.00                    | –              | 1.00                              | –              |
| 2 <sup>nd</sup> (9.3 – 31.4)                                                                                    | 2492                        | 11.4<br>(10.3, 12.6)                  | 0.87<br>(0.76, 1.01)    | 0.07           | 0.93<br>(0.80, 1.08)              | 0.33           |
| 3 <sup>rd</sup> (33.3 – 74.8)                                                                                   | 2456                        | 14.8<br>(13.8, 15.8)                  | 1.17<br>(1.04, 1.32)    | 0.009          | 1.26<br>(1.11, 1.43)              | 0.0003         |
| 4 <sup>th</sup> (77.5 – 129.6)                                                                                  | 2348                        | 13.7<br>(12.7, 14.7)                  | 1.07<br>(0.95, 1.22)    | 0.27           | 1.17<br>(1.02, 1.34)              | 0.02           |
| <i>Autumn</i>                                                                                                   |                             |                                       |                         |                |                                   |                |
| 1 <sup>st</sup> (62.0 – 440.5)                                                                                  | 2352                        | 11.6<br>(10.5, 12.7)                  | 1.00                    | –              | 1.00                              | –              |
| 2 <sup>nd</sup> (444.5 – 629.5)                                                                                 | 2498                        | 13.3<br>(12.6, 14.1)                  | 1.17<br>(1.03, 1.33)    | 0.01           | 1.15<br>(1.01, 1.31)              | 0.03           |
| 3 <sup>rd</sup> (635.6 – 798.5)                                                                                 | 2495                        | 15.0<br>(14.1, 15.9)                  | 1.34<br>(1.18, 1.53)    | <0.0001        | 1.38<br>(1.21, 1.58)              | <0.0001        |
| 4 <sup>th</sup> (798.5 – 1064.2)                                                                                | 2348                        | 12.4<br>(11.5, 13.3)                  | 1.07<br>(0.94, 1.23)    | 0.29           | 1.16<br>(1.01, 1.34)              | 0.04           |

# Monthly statewide mean HDD for 2006–2007 were downloaded from the NOAA, NCDC at <ftp://ftp.ncdc.noaa.gov/pub/data/cirs/>. HDD is a statewide population-weighted measure of energy demand to heat indoor structures by one degree for one day using a baseline temperature of 65 degrees Fahrenheit.

Season: Winter = December through February; Spring = March through May; Summer = June through August; Autumn = September through November.

## Calculated as the sum of differences between the average daily temperature and a base of 65 deg Fahrenheit averaged over the span of 12 months.

\* Univariate logistic regression models were constructed with eczema (yes/no) modeled as the dependent variable and mean seasonal HDD (quartiles) as the independent variable. OR were estimated for quartiles- 2, 3 and 4 compared with quartile 1.

\*\* Multivariate logistic regression models were constructed with eczema (yes/no) modeled as the dependent variable and mean seasonal HDD (quartiles) as the independent variable, including age, race/ethnicity (African-American, Hispanic, Caucasian, or Multi/Other), sex (male or female), household income (0-99%, 100-199%, 200-399%, 400+% of poverty level). Adjusted OR were estimated for quartiles- 2, 3 and 4 compared with quartile 1.

| <b>Table S3. Association between eczema prevalence and mean seasonal precipitation.</b> |                         |                                   |                      |                |                               |                |
|-----------------------------------------------------------------------------------------|-------------------------|-----------------------------------|----------------------|----------------|-------------------------------|----------------|
| <b>Mean seasonal precipitation (in) – quartile (min – max)</b>                          | <b>Eczema Frequency</b> | <b>Eczema Prevalence (95% CI)</b> | <b>OR* (95% CI)</b>  | <b>P-value</b> | <b>Adjusted OR** (95% CI)</b> | <b>P-value</b> |
| <i>Winter</i>                                                                           |                         |                                   |                      |                |                               |                |
| 1 <sup>st</sup> (0.5 – 1.2)                                                             | 2126                    | 12.4<br>(11.5, 13.3)              | 1.00                 | –              | 1.00                          | –              |
| 2 <sup>nd</sup> (1.5 – 2.8)                                                             | 2289                    | 12.5<br>(11.3, 13.7)              | 1.04<br>(0.93, 1.18) | 0.49           | 0.97<br>(0.85, 1.10)          | 0.61           |
| 3 <sup>rd</sup> (2.8 – 3.3)                                                             | 2529                    | 13.2<br>(12.2, 14.2)              | 1.06<br>(0.94, 1.20) | 0.35           | 1.00<br>(0.89, 1.14)          | 0.97           |
| 4 <sup>th</sup> (3.4 – 5.5)                                                             | 2309                    | 13.4<br>(12.6, 14.1)              | 1.10<br>(1.00, 1.21) | 0.05           | 1.01<br>(0.91, 1.12)          | 0.86           |
| <i>Spring</i>                                                                           |                         |                                   |                      |                |                               |                |
| 1 <sup>st</sup> (0.2 – 2.5)                                                             | 2215                    | 10.7<br>(9.2, 12.1)               | 1.00                 | –              | 1.00                          | –              |
| 2 <sup>nd</sup> (2.7 – 3.5)                                                             | 2383                    | 13.2<br>(12.2, 14.1)              | 1.28<br>(1.08, 1.53) | 0.005          | 1.17<br>(0.98, 1.40)          | 0.09           |
| 3 <sup>rd</sup> (3.7 – 4.0)                                                             | 2196                    | 14.2<br>(13.3, 15.2)              | 1.38<br>(1.17, 1.64) | 0.0002         | 1.24<br>(1.04, 1.48)          | 0.02           |
| 4 <sup>th</sup> (4.1 – 6.0)                                                             | 2459                    | 14.0<br>(13.1, 15.0)              | 1.37<br>(1.15, 1.64) | 0.0004         | 1.31<br>(1.10, 1.57)          | 0.003          |
| <i>Summer</i>                                                                           |                         |                                   |                      |                |                               |                |
| 1 <sup>st</sup> (0.2 – 2.4)                                                             | 2171                    | 10.6<br>(9.1, 12.2)               | 1.00                 | –              | 1.00                          | –              |
| 2 <sup>nd</sup> (2.7 – 3.6)                                                             | 2382                    | 13.2<br>(12.4, 14.0)              | 1.32<br>(1.11, 1.56) | 0.001          | 1.21<br>(1.02, 1.44)          | 0.03           |
| 3 <sup>rd</sup> (3.6 – 4.1)                                                             | 2347                    | 14.1<br>(13.0, 15.3)              | 1.37<br>(1.14, 1.64) | 0.0008         | 1.23<br>(1.02, 1.48)          | 0.03           |
| 4 <sup>th</sup> (4.1 – 6.7)                                                             | 2353                    | 13.5<br>(12.6, 14.4)              | 1.31<br>(1.10, 1.56) | 0.002          | 1.21<br>(1.01, 1.44)          | 0.04           |
| <i>Autumn</i>                                                                           |                         |                                   |                      |                |                               |                |
| 1 <sup>st</sup> (0.6 – 1.8)                                                             | 2104                    | 10.2<br>(8.6, 11.7)               | 1.00                 | –              | 1.00                          | –              |
| 2 <sup>nd</sup> (1.9 – 3.7)                                                             | 2308                    | 13.0<br>(12.0, 14.0)              | 1.33<br>(1.13, 1.57) | 0.0005         | 1.23<br>(1.04, 1.46)          | 0.02           |
| 3 <sup>rd</sup> (3.7 – 4.5)                                                             | 2450                    | 14.5<br>(13.6, 15.4)              | 1.41<br>(1.20, 1.66) | <0.0001        | 1.29<br>(1.09, 1.53)          | 0.004          |
| 4 <sup>th</sup> (4.6 – 6.2)                                                             | 2391                    | 14.2<br>(13.3, 15.1)              | 1.41<br>(1.20, 1.65) | <0.0001        | 1.32<br>(1.11, 1.55)          | 0.001          |

# Monthly statewide mean values of “time-bias” corrected annual precipitation (in) for 2006 – 2007 were downloaded from the NOAA, NCDC at <ftp://ftp.ncdc.noaa.gov/pub/data/cirs/>.

\* Univariate logistic regression models were constructed with eczema (yes/no) modeled as the dependent variable and precipitation (quartiles) as the independent variable.

\*\* Multivariate logistic regression models were constructed with eczema (yes/no) modeled as the dependent variable and precipitation (quartile) as the independent variable, including age, race/ethnicity (African-American, Hispanic, Caucasian, or Multi/Other), sex (male or female), household income (0-99%, 100-199%, 200-399%, 400+% of poverty level).
